# Supplementary material for: Comprehensive Evaluation and Error-Component Analysis of Four Satellite-Based Precipitation Estimates against Gauged Rainfall over Mainland China
Source: Hindawi journal article supplement (doi:10.1155/2022/9070970), 2022-05-10
Supplement: f1 [file 9070970.f1.zip]

Archive with 12 entries (12 files):
- 9070970_supplementary materials.docx
- Appendix Figures/FigureS1.eps
- Appendix Figures/FigureS2.eps
- Appendix Figures/FigureS3.eps
- Appendix Figures/FigureS4.eps
- Appendix Figures/FigureS5.eps
- Appendix Figures/FigureS6.eps
- Appendix tables/Appendix table1.docx
- Appendix tables/Appendix table2.docx
- Appendix tables/Appendix table3.docx
- Appendix tables/Appendix table4.docx
- Appendix tables/Appendix table5.docx
