# Supplementary material for: Comprehensive Evaluation and Error-Component Analysis of Four Satellite-Based Precipitation Estimates against Gauged Rainfall over Mainland China
Source: Hindawi journal article supplement (doi:10.1155/2022/9070970), 2022-05-10
Supplement: f1 [file 9070970.f1.zip › 9070970_supplementary materials.docx]

Appendix A. Characteristics of eight sub-regions within Mainland China

Appendix B**.** Contingency table for comparing satellite precipitation and gauge observation

|  |  | Satellite precipitation | |
| --- | --- | --- | --- |
|  |  | Rain (Daily rain ≥ 1 mm ) | No-rain (Daily rain < 1 mm ) |
| Gauge observation | Rain (Daily rain ≥ 1 mm ) | Hit (H) | Missed (M) |
| No-rain (Daily rain < 1 mm ) | False (F) | Correct negative |

Appendix C**.**  Description of continuous and categorical statistical metrics used for the pairwise comparison between the SPPs and gauged observations

| Statistical Indices | Formula | Perfect Value |
| --- | --- | --- |
| Pearson Correlation Coefficient (r) |  | 1 |
| Relative Bias (RB) |  | 0% |
| Mean Absolute Error (MAE) |  | 0 |
| Root Mean Square Error (RMSE) |  | 0 |
| Probability of Detection (POD) |  | 100% |
| False Alarm Ratio (FAR) |  | 0% |
| Critical Success Index (CSI) |  | 100% |

Appendix D. Error Decomposition and Relative Bias Ratio (RBR)

The practical error decomposition analysis used to trace the source of the errors in the SPPs was introduced by Tian *et al*. [[33](#_ENREF_33)]. This analysis decomposes the total precipitation bias (TB) into three independent parts: hit bias (HB), missed precipitation (MB) and false precipitation (FB). The relation of these four error type can be expressed as:. Later, an improvement of the error decomposition scheme from Tian *et al*. was given by Yong *et al*. [[10](#_ENREF_10)]. Given that the probability distribution of precipitation rate is nearer to lognormal than Gaussian, the range of precipitation rate are divided into(in this paper,) logarithm-scaled bins. And the boundaries of each bin are , whereis a threshold (here,mm/day) of rain/no-rain, and(in this study,) expresses the fixed ratio between the two adjacent boundaries (or constant difference in logarithm-scale) [[10](#_ENREF_10)].

Given a precipitation field(expressed in units of mm/day) a binary-valued raining mask for the whole range of precipitation ratescan be defined as:

,

and for each value falling into the ith precipitation rate bin,can be obtained as:

.

Based on a satellite-based precipitation field and a gauge precipitation observation dataset, with their respective precipitation event masks,and, three masks (a hit mask (), a miss mask () and a false mask ()) can then be respectively defined as follows:

; ; ,

where,andexpress the Boolean complements of the corresponding precipitation event masks and,respectively. The three masks are independent or orthogonal each other for the reasons as follows:

.

In the recent research, hit bias is further decomposed into three parts: positive hit bias (PHB), negative hit bias (NHB) and equal hit bias (EHB). PHB represents the error associated with those hit precipitation events when the satellite-based precipitation is over the observed precipitation (i.e., *R*o ≥1, *R*s ≥1 and *R*s > *R*o), and its Boolean mask is defined as.

Similarly, NHB represents the error associated with those hit precipitation events when the satellite-based precipitation is under the observed precipitation (i.e., *R*o ≥1, *R*s ≥1 and *R*s < *R*o), and its Boolean mask is defined as.

Additionally, EHB represents the error associated with those hit precipitation events when the satellite-based precipitation is equal to the observed precipitation (i.e., *R*o ≥1, *R*s ≥1 and *R*s = *R*o), and its Boolean mask is defined as.

The relative bias ratio (hereafter referred to as “RBR ”) is defined as the error component divided by the whole areal and temporal gauge observation precipitation. Then, within the total range of precipitation rates, the relative bias ratios of hit bias,, of the MP,, of the FP,, and of total bias, can be expressed as:

,

where,denotes the whole areal and temporal gauge observation precipitation.

Similarly, the mask of each bin (i.e., the mask of jth precipitation rate bin,) is also independent to one another. Within jth precipitation rate, the relative bias contribution ratios of hit bias,, of the MP,, and of the FP can then be calculated as:

.

Additionally, the relative bias contribution ratios of PHB and NHB can be calculated as.

Another error decomposition technique separated the total mean squared error into random and systematic error components [[42](#_ENREF_42),[61](#_ENREF_61),[62](#_ENREF_62)] as:

where and are the satellite-based and ground-based precipitation datasets, respectively; and are random and systematic errors (%) in the form of the percentage of the total mean squared error, respectively; and are the intercept and slope of the additive error model [[63](#_ENREF_63)], respectively.

Appendix E. The area-averaged values of r, RB, RMSE and MAE for the four satellite-based products over Mainland China and eight sub-regions from March 2014 to June 2018

| Index | Type China | XJ | TP | XB | YG | DB | HB | CJ | HN |
| --- | --- | --- | --- | --- | --- | --- | --- | --- | --- |
| r | V06C 0.44 | 0.34 | 0.37 | 0.42 | 0.37 | 0.43 | 0.44 | 0.49 | 0.51 |
| V06UC 0.42 | 0.32 | 0.35 | 0.40 | 0.36 | 0.41 | 0.42 | 0.47 | 0.50 |
| CDR 0.33 | 0.21 | 0.30 | 0.29 | 0.28 | 0.33 | 0.33 | 0.38 | 0.42 |
| BLD 0.48 | 0.36 | 0.41 | 0.46 | 0.41 | 0.49 | 0.49 | 0.54 | 0.56 |
| RB (%) | V06C 12.99 | 53.15 | 22.29 | 15.82 | 7.78 | 16.26 | 12.49 | 8.19 | 5.42 |
| V06UC 17.7 | 107.4 | -13.9 | 27.69 | -5.73 | 31.28 | 29.74 | 9.73 | -3.27 |
| CDR 16.31 | 89.32 | 66.03 | 13.46 | 6.49 | 17.28 | 13.52 | 6.29 | 8.22 |
| BLD 8.22 | 48.32 | 20.12 | 11.78 | 6.63 | 4.04 | 7.67 | 4.13 | -1.02 |
| RMSE (mm/day) | V06C 8.35 | 2.31 | 4.18 | 4.32 | 9.93 | 6.11 | 7.32 | 11.29 | 13.52 |
| V06UC 8.69 | 2.75 | 3.74 | 4.68 | 9.85 | 6.58 | 7.99 | 11.91 | 13.58 |
| CDR 8.39 | 2.25 | 4.81 | 4.26 | 9.96 | 5.92 | 7.20 | 11.49 | 13.81 |
| BLD 7.71 | 2.33 | 3.91 | 4.15 | 9.27 | 5.54 | 6.87 | 10.32 | 12.14 |
| MAE(mm/day) | V06C 3.11 | 0.79 | 1.73 | 1.45 | 3.93 | 2.02 | 2.31 | 4.61 | 5.33 |
| V06UC 3.16 | 0.93 | 1.49 | 1.55 | 3.77 | 2.20 | 2.55 | 4.70 | 5.19 |
| CDR 3.50 | 0.91 | 2.24 | 1.65 | 4.28 | 2.24 | 2.67 | 5.16 | 6.02 |
| BLD 2.81 | 0.74 | 1.62 | 1.36 | 3.68 | 1.70 | 2.09 | 4.07 | 4.82 |

Appendix F. Relative Bias Ratio (RBR) for the hit bias (HB), negative hit bias (NHB) and positive hit bias (PHB)

Figure S1. Intensity distribution of relative bias ratio for the hit bias, negative hit bias (NHB) and positive hit bias (PHB) of RV06C, RV06UC, CDR and BLD during summers of the period (from March 2014 to June 2018) over China, XJ and TP sub-regions.

Figure S2. Same as Figure S1 except for the XB, YG and DB sub-regions.

Figure S3. Same as Figure S1 except for the HB, CJ and HN sub-regions.

Figure S4. Same as Figure S1, but for winter seasons.

Figure S5. Same as Figure S2, but for winter seasons.

Figure S6. Same as Figure S3, but for winter seasons.

Appendix G.Area-averaged contribution ratio (%) of the error components to total bias of RV06C, RV06UC, CDR and BLD for winter and summer seasons over Mainland China and the eight selected sub-regions

| Region | Type | Summer | | | | Winter | | | | |
| --- | --- | --- | --- | --- | --- | --- | --- | --- | --- | --- |
| HB/TP(%) | -MB/TP (%) | FB/TP  (%) | TB/TP=(HB-MB+FB)/TP (%) | | HB/TP (%) | -MB/TP (%) | FB/TP(%) | TB/TP=(HB-MB+FB)/TP (%) |
| China | RV06C | -10.61 | -15.4 | 32.52 | 6.51 | 6.23 | | -40.67 | 34.07 | -0.37 |
| RV06UC | -11.16 | -15.99 | 33.38 | 6.23 | 7.82 | | -43.8 | 34.38 | -1.6 |
| CDR | -25.44 | -13.37 | 46.8 | 7.99 | -5.12 | | -48.48 | 56.22 | 2.62 |
| BLD | -16.19 | -11.5 | 29.81 | 2.12 | -8.64 | | -22.84 | 30.76 | -0.72 |
| XJ | RV06C | -22.17 | -34.14 | 59.4 | 3.09 | -8.05 | | -74.97 | 56.7 | -26.3 |
| RV06UC | -6.94 | -32.14 | 99.99 | 60.91 | -9.11 | | -83.03 | 38.2 | -53.9 |
| CDR | -34.85 | -36.32 | 72.84 | 1.67 | -31.96 | | -59.31 | 84.3 | -6.97 |
| BLD | -13.16 | -36.45 | 53.77 | 4.16 | -15.49 | | -41.1 | 59 | 2.41 |
| TP | RV06C | -3.68 | -20.99 | 36.02 | 11.53 | -10.89 | | -72.94 | 36.79 | -47 |
| RV06UC | -21.28 | -27.9 | 24.71 | -24.47 | -12.42 | | -77.25 | 23.21 | -66.5 |
| CDR | 6.6 | -20.31 | 58.14 | 44.43 | -22.46 | | -59.68 | 109.8 | 27.66 |
| BLD | -4.86 | -19.26 | 32.18 | 8.06 | -12.96 | | -66 | 88.49 | 9.53 |
| XB | RV06C | -10.23 | -23.8 | 42.86 | 8.83 | -5.96 | | -76.12 | 36.52 | -45.6 |
| RV06UC | -4.47 | -23.86 | 49.45 | 21.12 | -7.23 | | -82.68 | 26.39 | -63.5 |
| CDR | -31.28 | -24.99 | 57.76 | 1.49 | -16.73 | | -63.43 | 76 | -4.16 |
| BLD | -12.95 | -20.19 | 39.04 | 5.9 | -8.52 | | -50.6 | 64.36 | 5.24 |
| YG | RV06C  RV06UC  CDR  BLD | -13.85  -19.3  -23.24  -19.57 | -15.44  -14.93  -16.07  -11.02 | 35.01  33.64  43.79  33.13 | 5.72  -0.59  4.48  2.54 | 6.14  2.54  -5.67  -6.81 | | -54.44  -59.91  -57.75  -34.34 | 37.32  27.65  66.54  44.12 | -11  -29.7  3.12  2.97 |
| DB | RV06C  RV06UC  CDR  BLD | -8.63  -7.11  -30.21  -15.54 | -19.41  -19.89  -13.94  -14.65 | 38.97  40.94  58.08  32.91 | 10.93  13.94  13.93  2.72 | -1.2  -1.2  -14.48  -10.23 | | -66.32  -71.83  -52.75  -28.5 | 89.52  106.2  88.43  37.38 | 19  33.17  21.2  -1.35 |
| HB | RV06C  RV06UC  CDR  BLD | -11.2  -8.96  -35.69  -17.9 | -23.86  -24.36  -17.31  -17.29 | 43.48  45.37  61.88  39.23 | 8.42  12.35  8.88  4.04 | -0.89  -0.89  -28.19  -9.42 | | -48.91  -49.65  -48.11  -33.32 | 54.15  74.3  85.69  55.18 | 4.35  23.76  9.39  12.44 |
| CJ | RV06C  RV06UC  CDR  BLD | -8.64  -5.96  -26.94  -13.79 | -11.7  -11.37  -9.12  -7.35 | 26.8  28.06  41.79  23.55 | 6.46  10.73  5.73  2.41 | 7.54  15.78  -5.02  -8.43 | | -35.81  -37.25  -43.39  -18.08 | 34.16  38.73  54.76  26.93 | 5.89  17.26  6.35  0.42 |
| HN | RV06C  RV06UC  CDR  BLD | -9.98  -11.69  -18.42  -16.23 | -7.02  -7.24  -6.56  -5.83 | 20.35  20.49  33.24  20.11 | 3.35  1.56  8.26  -1.95 | 8.85  4.09  3.05  -9.11 | | -32.62  -36.53  -48.04  -17.02 | 22.54  17.09  40.94  18.89 | -1.23  -15.4  -4.05  -7.24 |
