# Supplementary material for: Comprehensive Evaluation and Error-Component Analysis of Four Satellite-Based Precipitation Estimates against Gauged Rainfall over Mainland China
Source: Hindawi journal article supplement (doi:10.1155/2022/9070970), 2022-05-10
Supplement: f1 [file 9070970.f1.zip › Appendix tables/Appendix table1.docx]

Appendix A. Characteristics of eight sub-regions within Mainland China
