# Supplementary material for: Comprehensive Evaluation and Error-Component Analysis of Four Satellite-Based Precipitation Estimates against Gauged Rainfall over Mainland China
Source: Hindawi journal article supplement (doi:10.1155/2022/9070970), 2022-05-10
Supplement: f1 [file 9070970.f1.zip › Appendix tables/Appendix table2.docx]

Appendix B**.** Contingency table for comparing satellite precipitation and gauge observation

|  |  | Satellite precipitation | |
| --- | --- | --- | --- |
|  |  | Rain (Daily rain ≥ 1 mm ) | No-rain (Daily rain < 1 mm ) |
| Gauge observation | Rain (Daily rain ≥ 1 mm ) | Hit (H) | Missed (M) |
| No-rain (Daily rain < 1 mm ) | False (F) | Correct negative |
