# Supplementary material for: Comprehensive Evaluation and Error-Component Analysis of Four Satellite-Based Precipitation Estimates against Gauged Rainfall over Mainland China
Source: Hindawi journal article supplement (doi:10.1155/2022/9070970), 2022-05-10
Supplement: f1 [file 9070970.f1.zip › Appendix tables/Appendix table3.docx]

Appendix C**.**  Description of continuous and categorical statistical metrics used for the pairwise comparison between the SPPs and gauged observations

| Statistical Indices | Formula | Perfect Value |
| --- | --- | --- |
| Pearson Correlation Coefficient (r) |  | 1 |
| Relative Bias (RB) |  | 0% |
| Mean Absolute Error (MAE) |  | 0 |
| Root Mean Square Error (RMSE) |  | 0 |
| Probability of Detection (POD) |  | 100% |
| False Alarm Ratio (FAR) |  | 0% |
| Critical Success Index (CSI) |  | 100% |
