# Supplementary material for: Comprehensive Evaluation and Error-Component Analysis of Four Satellite-Based Precipitation Estimates against Gauged Rainfall over Mainland China
Source: Hindawi journal article supplement (doi:10.1155/2022/9070970), 2022-05-10
Supplement: f1 [file 9070970.f1.zip › Appendix tables/Appendix table4.docx]

Appendix E. The area-averaged values of r, RB, RMSE and MAE for the four satellite-based products over Mainland China and eight sub-regions from March 2014 to June 2018

| Index | Type China | XJ | TP | XB | YG | DB | HB | CJ | HN |
| --- | --- | --- | --- | --- | --- | --- | --- | --- | --- |
| r | V06C 0.44 | 0.34 | 0.37 | 0.42 | 0.37 | 0.43 | 0.44 | 0.49 | 0.51 |
| V06UC 0.42 | 0.32 | 0.35 | 0.40 | 0.36 | 0.41 | 0.42 | 0.47 | 0.50 |
| CDR 0.33 | 0.21 | 0.30 | 0.29 | 0.28 | 0.33 | 0.33 | 0.38 | 0.42 |
| BLD 0.48 | 0.36 | 0.41 | 0.46 | 0.41 | 0.49 | 0.49 | 0.54 | 0.56 |
| RB (%) | V06C 12.99 | 53.15 | 22.29 | 15.82 | 7.78 | 16.26 | 12.49 | 8.19 | 5.42 |
| V06UC 17.7 | 107.4 | -13.9 | 27.69 | -5.73 | 31.28 | 29.74 | 9.73 | -3.27 |
| CDR 16.31 | 89.32 | 66.03 | 13.46 | 6.49 | 17.28 | 13.52 | 6.29 | 8.22 |
| BLD 8.22 | 48.32 | 20.12 | 11.78 | 6.63 | 4.04 | 7.67 | 4.13 | -1.02 |
| RMSE (mm/day) | V06C 8.35 | 2.31 | 4.18 | 4.32 | 9.93 | 6.11 | 7.32 | 11.29 | 13.52 |
| V06UC 8.69 | 2.75 | 3.74 | 4.68 | 9.85 | 6.58 | 7.99 | 11.91 | 13.58 |
| CDR 8.39 | 2.25 | 4.81 | 4.26 | 9.96 | 5.92 | 7.20 | 11.49 | 13.81 |
| BLD 7.71 | 2.33 | 3.91 | 4.15 | 9.27 | 5.54 | 6.87 | 10.32 | 12.14 |
| MAE(mm/day) | V06C 3.11 | 0.79 | 1.73 | 1.45 | 3.93 | 2.02 | 2.31 | 4.61 | 5.33 |
| V06UC 3.16 | 0.93 | 1.49 | 1.55 | 3.77 | 2.20 | 2.55 | 4.70 | 5.19 |
| CDR 3.50 | 0.91 | 2.24 | 1.65 | 4.28 | 2.24 | 2.67 | 5.16 | 6.02 |
| BLD 2.81 | 0.74 | 1.62 | 1.36 | 3.68 | 1.70 | 2.09 | 4.07 | 4.82 |
