# Supplementary material for: Comprehensive Evaluation and Error-Component Analysis of Four Satellite-Based Precipitation Estimates against Gauged Rainfall over Mainland China
Source: Hindawi journal article supplement (doi:10.1155/2022/9070970), 2022-05-10
Supplement: f1 [file 9070970.f1.zip › Appendix tables/Appendix table5.docx]

Appendix G.Area-averaged contribution ratio (%) of the error components to total bias of RV06C, RV06UC, CDR and BLD for winter and summer seasons over Mainland China and the eight selected sub-regions

| Region | Type | Summer | | | | Winter | | | | |
| --- | --- | --- | --- | --- | --- | --- | --- | --- | --- | --- |
| HB/TP(%) | -MB/TP (%) | FB/TP  (%) | TB/TP=(HB-MB+FB)/TP (%) | | HB/TP (%) | -MB/TP (%) | FB/TP(%) | TB/TP=(HB-MB+FB)/TP (%) |
| China | RV06C | -10.61 | -15.4 | 32.52 | 6.51 | 6.23 | | -40.67 | 34.07 | -0.37 |
| RV06UC | -11.16 | -15.99 | 33.38 | 6.23 | 7.82 | | -43.8 | 34.38 | -1.6 |
| CDR | -25.44 | -13.37 | 46.8 | 7.99 | -5.12 | | -48.48 | 56.22 | 2.62 |
| BLD | -16.19 | -11.5 | 29.81 | 2.12 | -8.64 | | -22.84 | 30.76 | -0.72 |
| XJ | RV06C | -22.17 | -34.14 | 59.4 | 3.09 | -8.05 | | -74.97 | 56.7 | -26.3 |
| RV06UC | -6.94 | -32.14 | 99.99 | 60.91 | -9.11 | | -83.03 | 38.2 | -53.9 |
| CDR | -34.85 | -36.32 | 72.84 | 1.67 | -31.96 | | -59.31 | 84.3 | -6.97 |
| BLD | -13.16 | -36.45 | 53.77 | 4.16 | -15.49 | | -41.1 | 59 | 2.41 |
| TP | RV06C | -3.68 | -20.99 | 36.02 | 11.53 | -10.89 | | -72.94 | 36.79 | -47 |
| RV06UC | -21.28 | -27.9 | 24.71 | -24.47 | -12.42 | | -77.25 | 23.21 | -66.5 |
| CDR | 6.6 | -20.31 | 58.14 | 44.43 | -22.46 | | -59.68 | 109.8 | 27.66 |
| BLD | -4.86 | -19.26 | 32.18 | 8.06 | -12.96 | | -66 | 88.49 | 9.53 |
| XB | RV06C | -10.23 | -23.8 | 42.86 | 8.83 | -5.96 | | -76.12 | 36.52 | -45.6 |
| RV06UC | -4.47 | -23.86 | 49.45 | 21.12 | -7.23 | | -82.68 | 26.39 | -63.5 |
| CDR | -31.28 | -24.99 | 57.76 | 1.49 | -16.73 | | -63.43 | 76 | -4.16 |
| BLD | -12.95 | -20.19 | 39.04 | 5.9 | -8.52 | | -50.6 | 64.36 | 5.24 |
| YG | RV06C  RV06UC  CDR  BLD | -13.85  -19.3  -23.24  -19.57 | -15.44  -14.93  -16.07  -11.02 | 35.01  33.64  43.79  33.13 | 5.72  -0.59  4.48  2.54 | 6.14  2.54  -5.67  -6.81 | | -54.44  -59.91  -57.75  -34.34 | 37.32  27.65  66.54  44.12 | -11  -29.7  3.12  2.97 |
| DB | RV06C  RV06UC  CDR  BLD | -8.63  -7.11  -30.21  -15.54 | -19.41  -19.89  -13.94  -14.65 | 38.97  40.94  58.08  32.91 | 10.93  13.94  13.93  2.72 | -1.2  -1.2  -14.48  -10.23 | | -66.32  -71.83  -52.75  -28.5 | 89.52  106.2  88.43  37.38 | 19  33.17  21.2  -1.35 |
| HB | RV06C  RV06UC  CDR  BLD | -11.2  -8.96  -35.69  -17.9 | -23.86  -24.36  -17.31  -17.29 | 43.48  45.37  61.88  39.23 | 8.42  12.35  8.88  4.04 | -0.89  -0.89  -28.19  -9.42 | | -48.91  -49.65  -48.11  -33.32 | 54.15  74.3  85.69  55.18 | 4.35  23.76  9.39  12.44 |
| CJ | RV06C  RV06UC  CDR  BLD | -8.64  -5.96  -26.94  -13.79 | -11.7  -11.37  -9.12  -7.35 | 26.8  28.06  41.79  23.55 | 6.46  10.73  5.73  2.41 | 7.54  15.78  -5.02  -8.43 | | -35.81  -37.25  -43.39  -18.08 | 34.16  38.73  54.76  26.93 | 5.89  17.26  6.35  0.42 |
| HN | RV06C  RV06UC  CDR  BLD | -9.98  -11.69  -18.42  -16.23 | -7.02  -7.24  -6.56  -5.83 | 20.35  20.49  33.24  20.11 | 3.35  1.56  8.26  -1.95 | 8.85  4.09  3.05  -9.11 | | -32.62  -36.53  -48.04  -17.02 | 22.54  17.09  40.94  18.89 | -1.23  -15.4  -4.05  -7.24 |
